# Supplementary material for: Zbtb20 modulates the sequential generation of neuronal layers in developing cortex
Source: PubMed Central journal article supplement (PMC4901408; doi:10.1186/s13041-016-0242-2), 2016-06-09

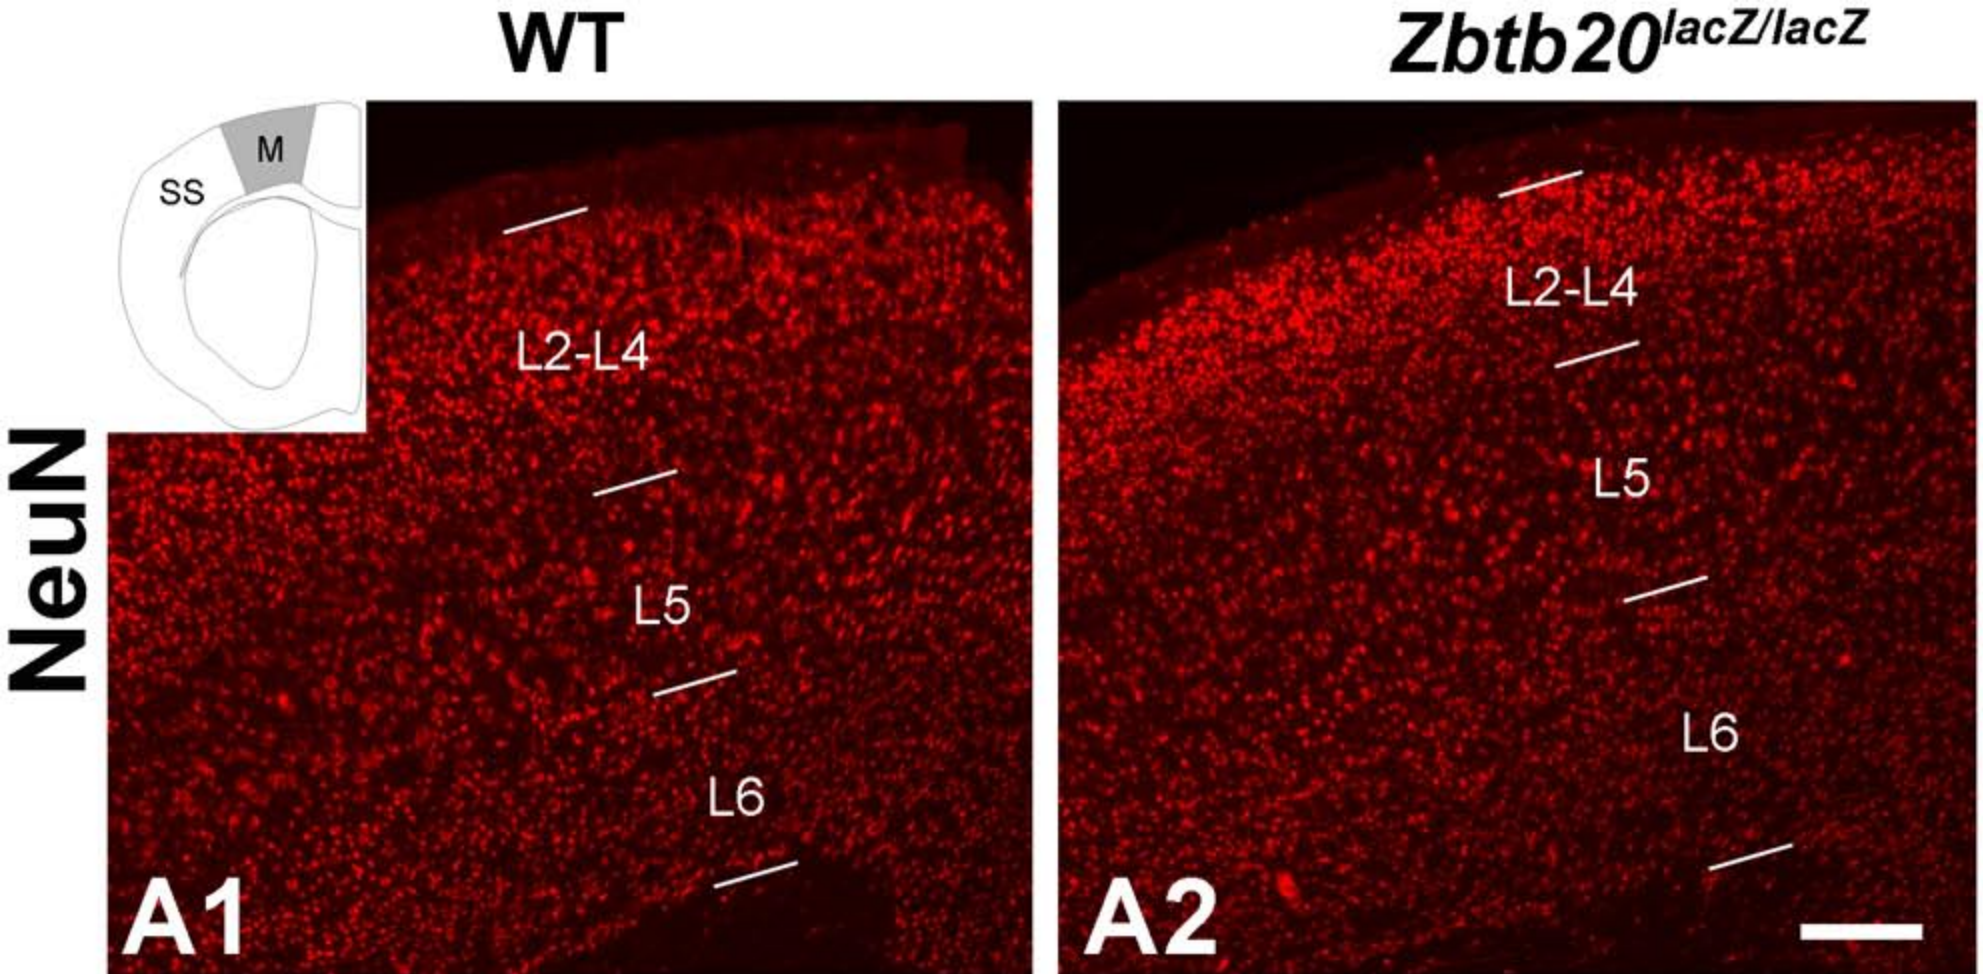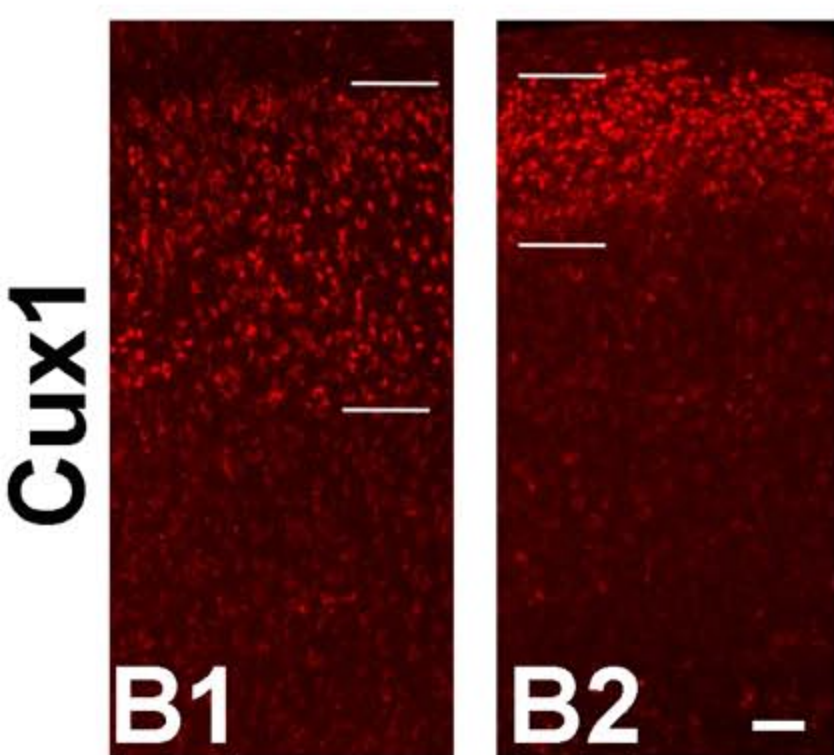

**B3** Cux1 (Motor Cortex, L2-L4)

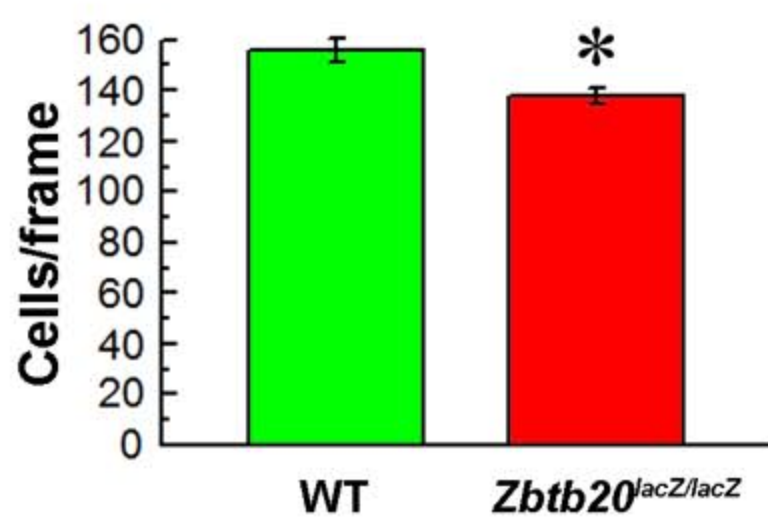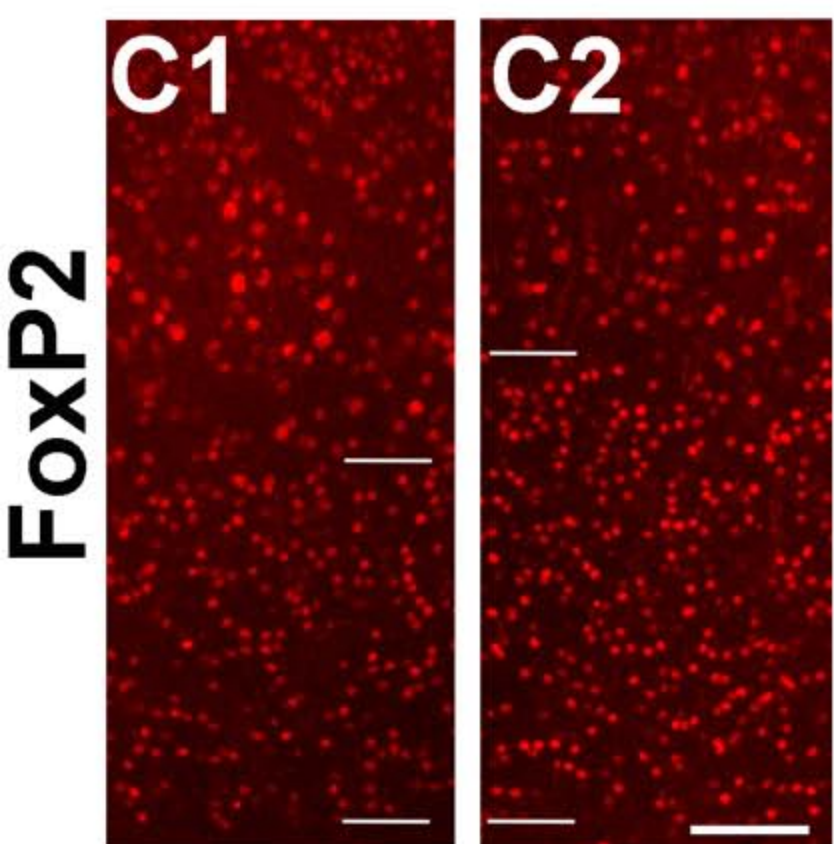

**C3** FoxP2 (Motor Cortex, L6)

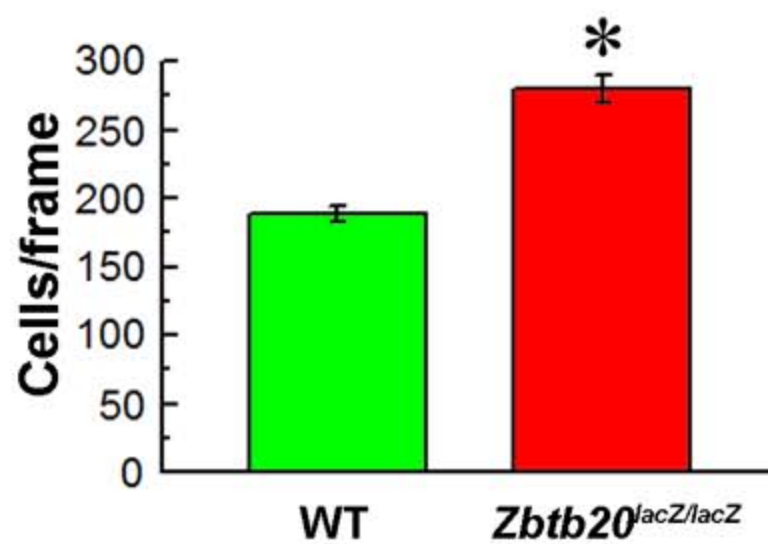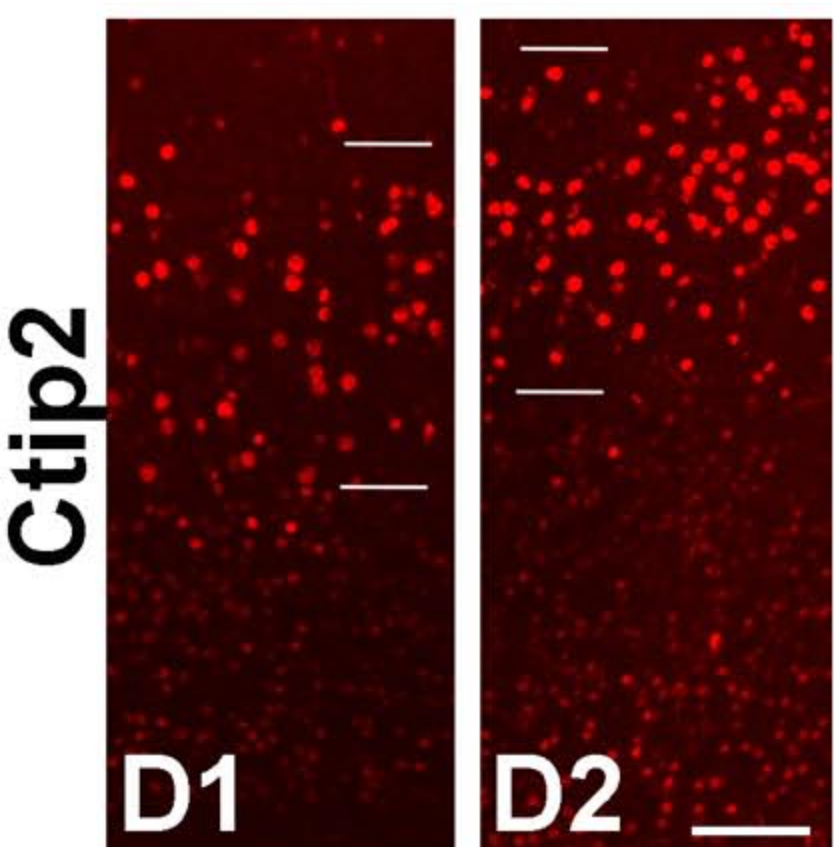

**D3** Ctip2 (Motor Cortex, L5)

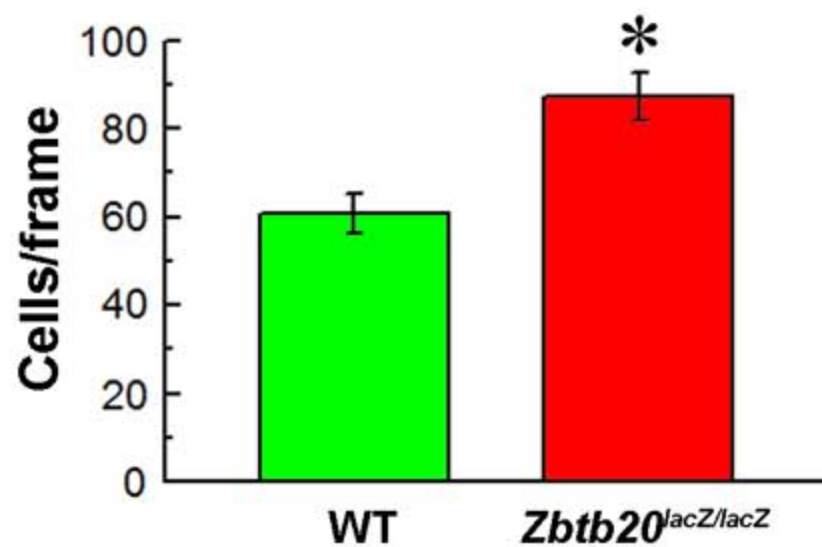

Supplement: 13041_2016_242_MOESM4_ESM.pdf [file 13041_2016_242_MOESM4_ESM.pdf]
